# Supplementary material for: Investigating Gendered Implicit Bias Among Healthcare Workers in South Africa: Development and Piloting of an Implicit Association Test in a High Tuberculosis and HIV Setting
Source: Research Square preprint supplement (doi:10.21203/rs.3.rs-9422562/v1), 2026-06-17
Supplement: Supplementary file 1 [file 172ecd59f5f5ce65a75b49fa.docx]

| **Table 1: Targets and Attributes Used in IAT** | | | |
| --- | --- | --- | --- |
| **Target** | **Exemplars** | | |
| Target Gender: Male | 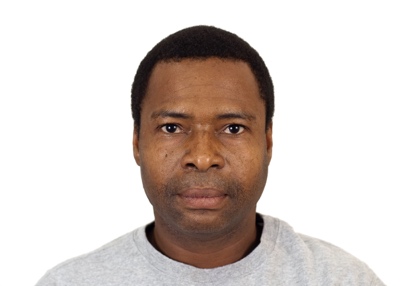 | 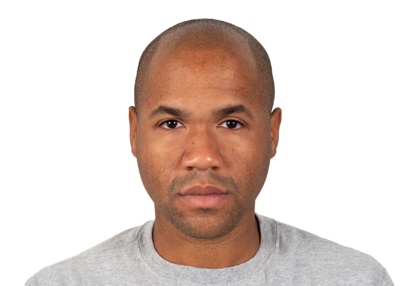 | 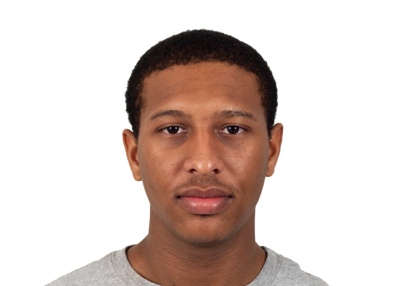 |
| Male 1 | Male 2 | Male 3 |
| 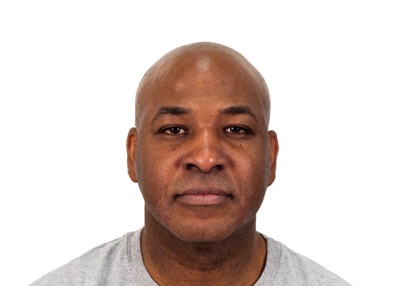 | 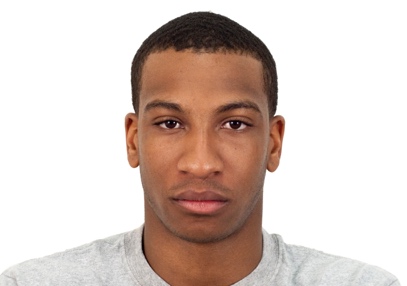 | 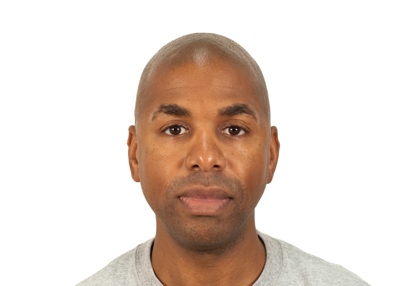 |
| Male 4 | Male 5 | Male 6 |
| Target Gender: Female | 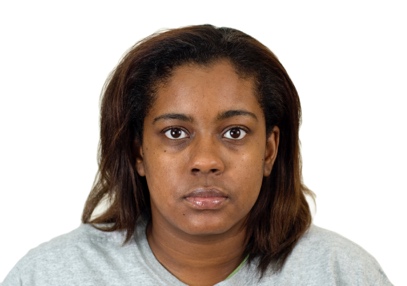 | 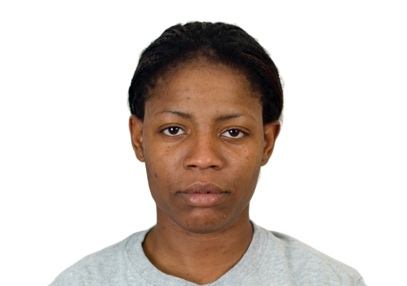 | 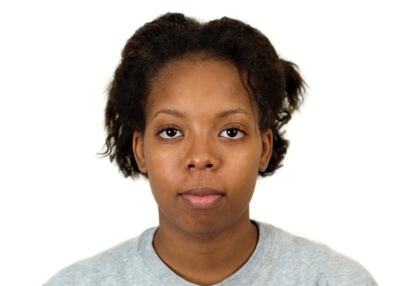 |
| Female 1 | Female 2 | Female 3 |
| 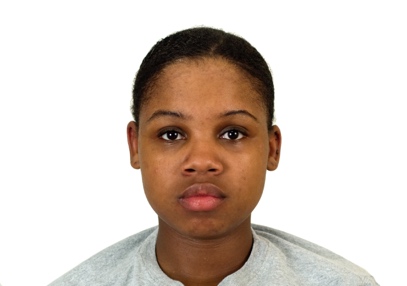 | 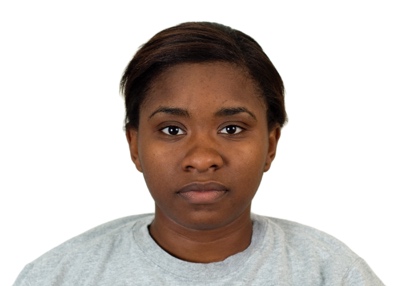 | 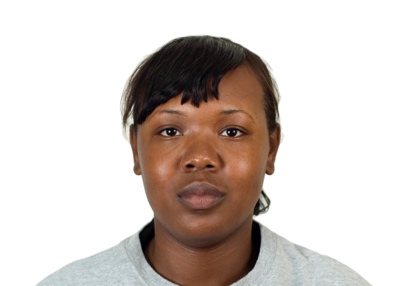 |
| Female 4 | Female 5 | Female 6 |
| **Attribute** | **Attitudes** | | |
| Good Patient | Adherent, On-time, Compliant, Calm, Cooperative, Listens, Respectful | | |
| Bad Patient | Default, Late, Stubborn, Angry, Difficult, Ignores, Disrespectful | | |
